# Supplementary material for: Addition of GAC caps and ozonation to conventional filters for improved organics and disinfection by-product reduction
Source: Royal Society of Chemistry journal article supplement (doi:10.1039/d1ew00901j), 2022-10-25
Supplement: d1ew00901j1.pdf [file d1ew00901j1.pdf]

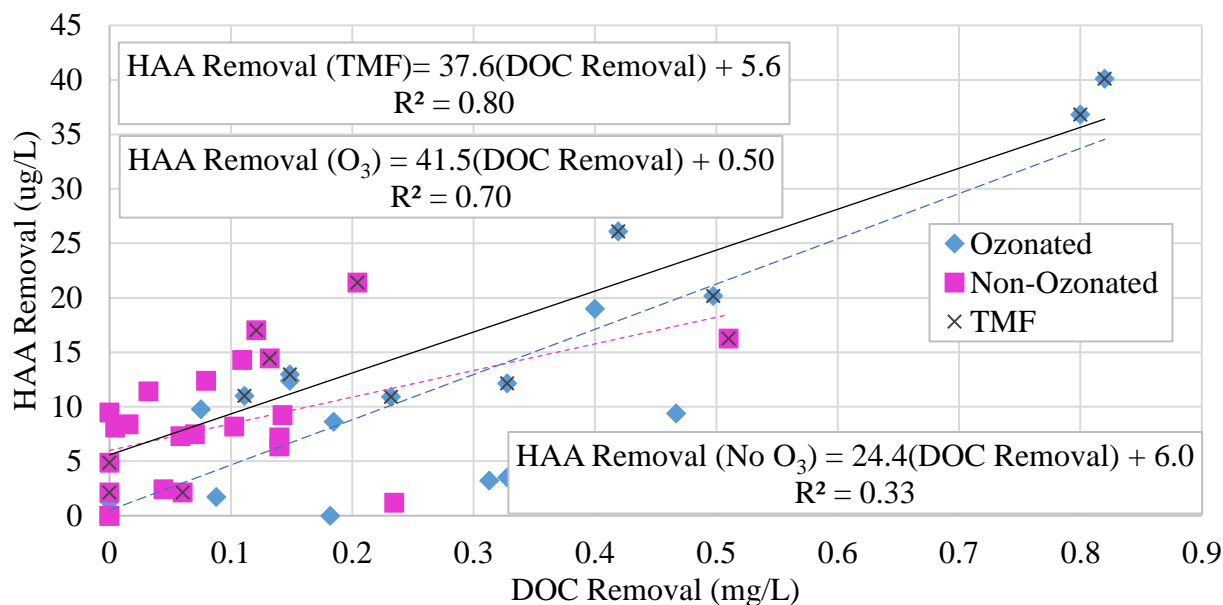

Figure S1: HAA FP reduction in ozonated, non-ozonated and tri-media pilot filters as a function of DOC removal; n=12

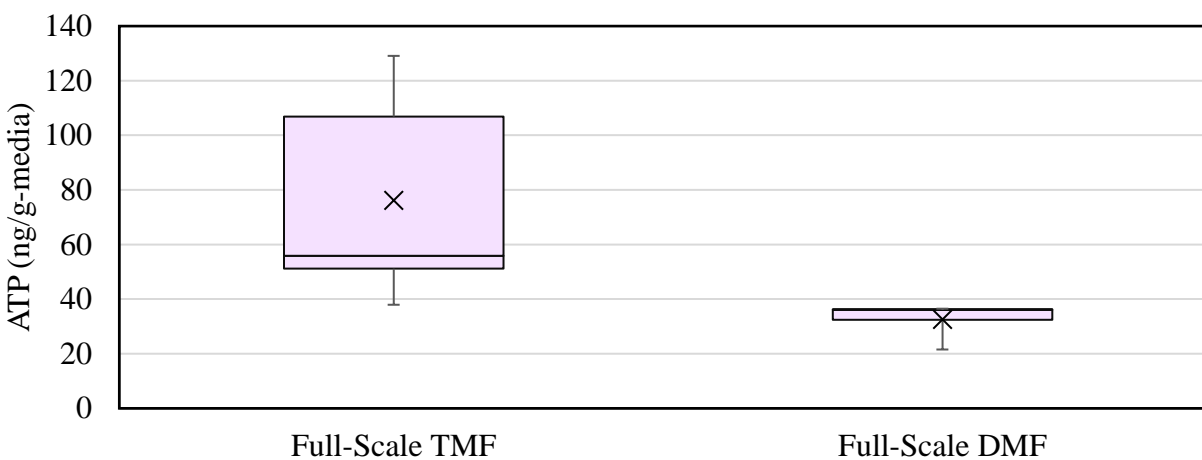

Figure S2: Box and whisker plot showing the ATP concentration measured in the top 5 cm of full-scale filters with and without GAC caps.; boxes represent 25th, 50th and 75th percentile values; 'X' represents the mean value; whiskers represent minimum and maximum values; five samples collected in duplicate; n=10.

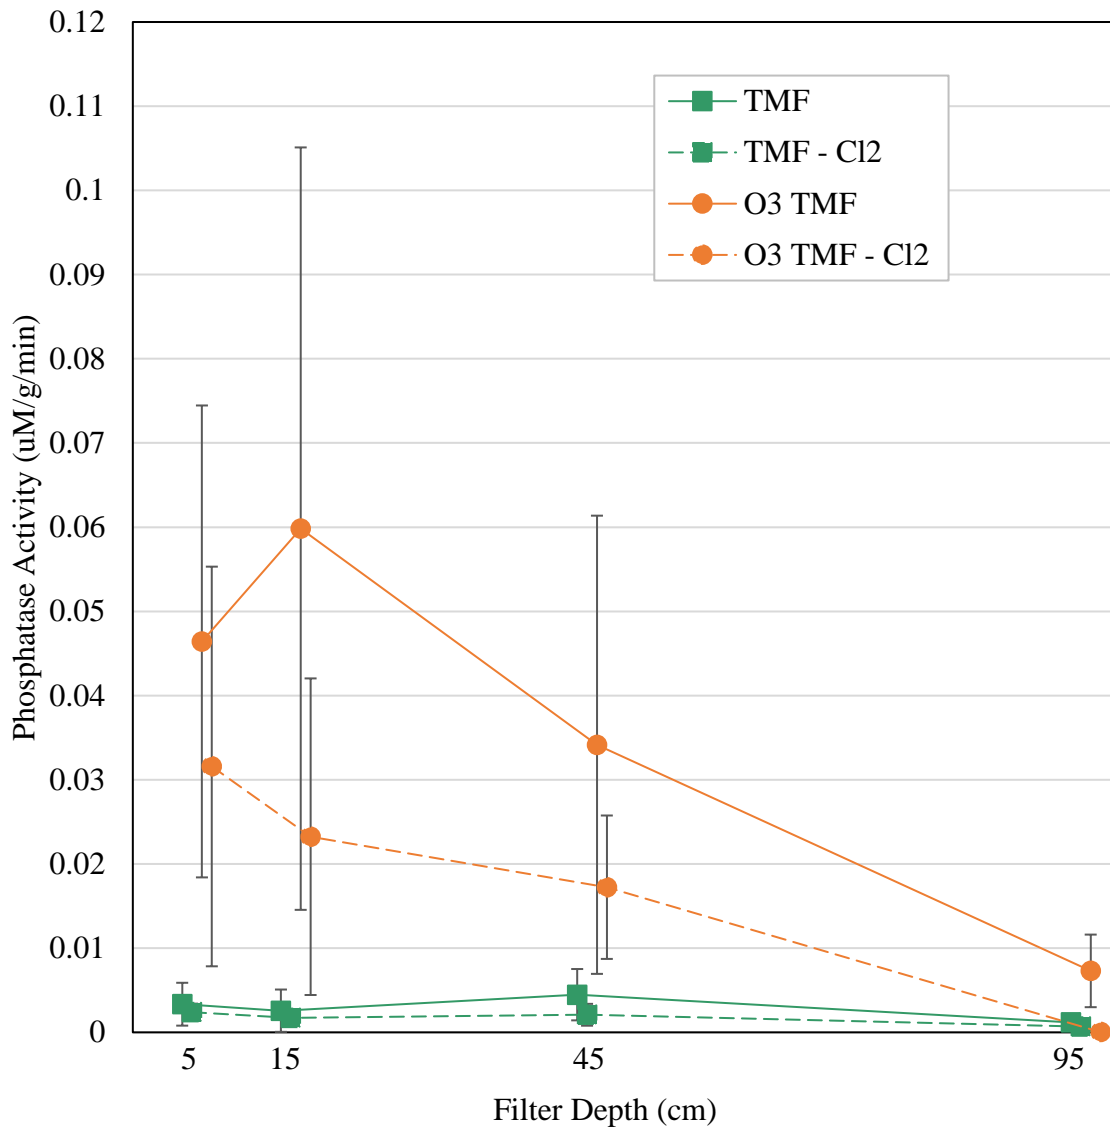

Figure S3. Average phosphatase activity depth profile for tri-media pilot filters over acclimation period (four sampling events); vertical bars show  $\pm 1$  standard deviation;  $n = 10$  for 5 and 15 cm samples,  $n=6$  for 45 and 95 cm samples.
